# Supplementary material for: Pilot study of the relation between various dynamics of avatar experience and perceptual characteristics
Source: PeerJ journal article supplement (doi:10.7717/peerj-cs.2042), 2024-05-21
Supplement: Appendix_93959JTstaff.pdf [file Appendix_93959JTstaff.pdf]

# 1 Appendix

2 In this study, we explored the impact of altering SoA, SoO, and CL through delays, including time lags and phase  
3 delays, as well as by considering the involved overshoot characteristics and movement intensity. Additionally, we  
4 examined their discrimination threshold for various settings using the specified avatar.

5 In a preliminary experiment, the study investigated how a change in SoO, SoA, and CL by manipulating avatar  
6 settings and the discrimination threshold of these setting parameters were related.

## 7 METHODS

8 Details of the used methods are present in the main manuscript. Method details considered as appendix material  
9 are as follows.

10 There were “comparison settings”: gain [-] ( $K_i = K_{NM} \cdot K_{MS}$ ) is  $\{K_1, K_2, K_3, K_4\} = \{150, 300, 400, 600\}$ ,  
11 damping coefficient [-] ( $\zeta_i = \zeta_{MN} = \zeta_{MS}$ ) is  $\{\zeta_1, \zeta_2, \zeta_3, \zeta_4\} = \{0.2, 0.45, 0.7, 0.95\}$ . Meanwhile, the fourth ques-  
12 tionnaire was designed to investigate the discrimination thresholds in which participants were asked whether there  
13 was a difference in the sensations of avatar control experience (whether they feel avatar movement as a “lack of  
14 movement” (-) or “hyper responsive movement” (+)), and rated their experience on a worst to best scale from  
15 “-3 to +3” compared to the standard setting (0) in “0.25” increments.

### 16 Examples of System Response

17 Examples of the avatar system’s responses to the NMSS model inputs are shown in Figure 10. As indicated in the  
18 figure, gain contributes to movement intensity, damping coefficient contributes to overshoot respectively.

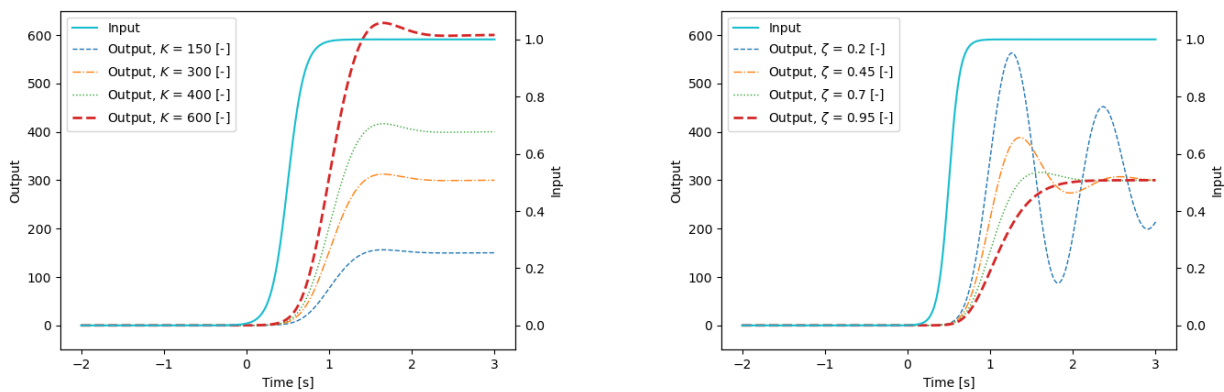

Figure 10: Pattern of each setting; left: gain, right: damping coefficient

## 19 RESULT

20 The values shown in each graph are the averaged value for all participants and its standard deviation. The values  
21 shown in the respective tables are the effect size of the multiple comparisons of the respective averaged values.

22 **Discrimination threshold**

23 The respective evaluated values and effect size with an asterisk indicate the size of those shown in Figure 11 and  
 24 Table 4.

- 25 • At whole parameters, evaluated values were close to zero in dummy setting ( $K_2, \omega_{np2}, \zeta_3, L_1$ ).
- 26 • For gain, the larger the comparison setting value, the more positive (felt “hyper responsive movement”) the  
 27 evaluated value was. In addition, all of the effect sizes were “large.”
- 28 • For natural angular frequency, the smaller the comparison setting value, the more negative (felt “lack of  
 29 movement”) the evaluated value was. The effect size for  $\omega_{np1} - \omega_{np2}$  was “medium,” and all other effect sizes  
 30 were “large.”
- 31 • For the damping coefficient, the larger the comparison setting value, the more negative the evaluated value  
 32 (felt “lack of movement”). In addition, all of the effect sizes were “large.”
- 33 • In dead time, when the comparison setting value shifted from  $L_1$  to  $L_2$ , the evaluated value was biased toward  
 34 positive (felt “hyper responsive movement”) and thereafter toward negative (felt “lack of movement”). The  
 35 effect size for  $L_1 - L_2$  and  $L_3 - L_4$  were “medium,” while the effect size for  $L_2 - L_3$  and  $L_2 - L_4$  were “large.”

Table 4: Discrimination threshold: effect sizes

|       | $K_2$ | $K_3$ | $K_4$ |
|-------|-------|-------|-------|
| $K_1$ | .82** | .90** | .91** |
| $K_2$ |       | .66** | .72** |
| $K_3$ |       |       | .77** |

|                | $\omega_{np2}$ | $\omega_{np3}$ | $\omega_{np4}$ |
|----------------|----------------|----------------|----------------|
| $\omega_{np1}$ | .48*           | .93**          | .96**          |
| $\omega_{np2}$ |                | .75**          | .88**          |
| $\omega_{np3}$ |                |                | .87**          |

|           | $\zeta_2$ | $\zeta_3$ | $\zeta_4$ |
|-----------|-----------|-----------|-----------|
| $\zeta_1$ | .87**     | .93**     | .98**     |
| $\zeta_2$ |           | .68**     | .92**     |
| $\zeta_3$ |           |           | .89**     |

|       | $L_2$ | $L_3$ | $L_4$ |
|-------|-------|-------|-------|
| $L_1$ | .46*  | .04   | .28   |
| $L_2$ |       | .87** | .53** |
| $L_3$ |       |       | .31*  |

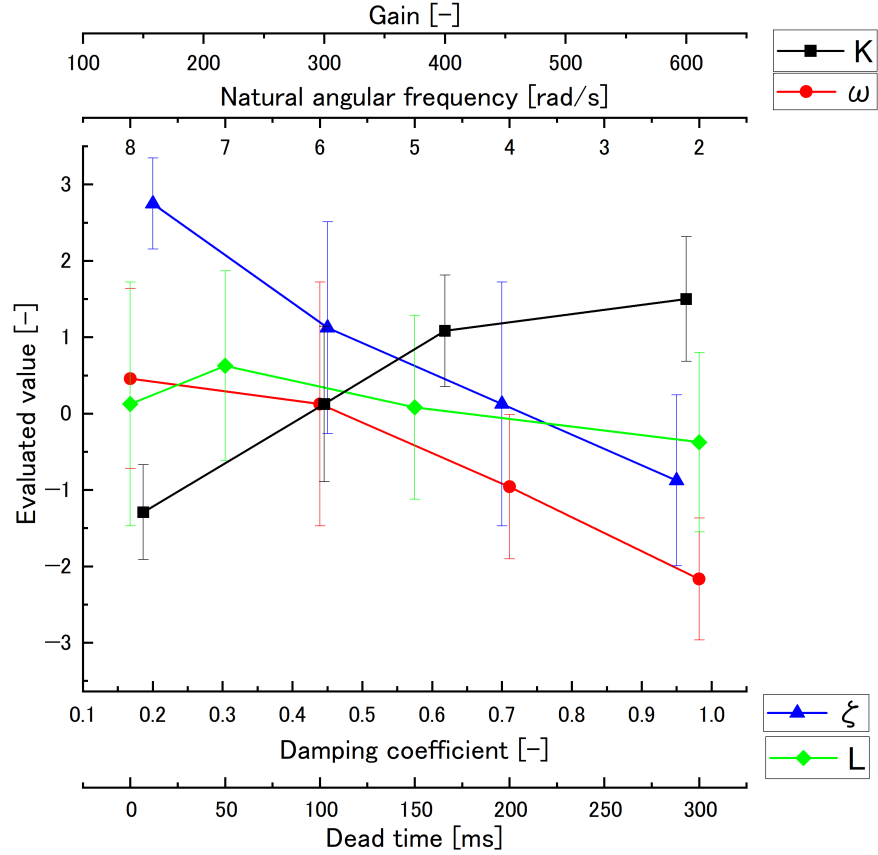

Figure 11: Discrimination threshold: evaluated value; natural angular frequency axis was reversed to be consistent with the dead time direction. The smaller the natural angular frequency, the larger the delay. However, because natural angular frequency range was narrow, its axis is not log scale.

### 36 Gain

37 The evaluated value and effect size in gain are shown in Figure 12 and Table 5.

- 38 • SoO values tended to be convex downward. The effect size of  $K_3 - K_4$  was “medium.”
- 39 • SoA values did not change effectively, regardless of the change in comparison setting value. Meanwhile, there
- 40 was no effect size indicating “medium” or “large.”
- 41 • CL values did not change effectively in the range of  $K_2 \leq K_i \leq K_4$ , but fell at  $K_1$ . The effect sizes of  $K_1 - K_2$
- 42 and  $K_1 - K_3$  were “medium.”

Table 5: Gain in the preliminary experiment: effect sizes (upper: SoO, middle: SoA, and lower: CL)

|       | $K_2$ | $K_3$ | $K_4$ |
|-------|-------|-------|-------|
| $K_1$ | .26   | .22   | .00   |
| $K_2$ |       | .10   | .25   |
| $K_3$ |       |       | .32*  |

|       | $K_2$ | $K_3$ | $K_4$ |
|-------|-------|-------|-------|
| $K_1$ | .11   | .03   | .14   |
| $K_2$ |       | .15   | .02   |
| $K_3$ |       |       | .17   |

|       | $K_2$ | $K_3$ | $K_4$ |
|-------|-------|-------|-------|
| $K_1$ | .41*  | .36*  | .26   |
| $K_2$ |       | .06   | .06   |
| $K_3$ |       |       | .03   |

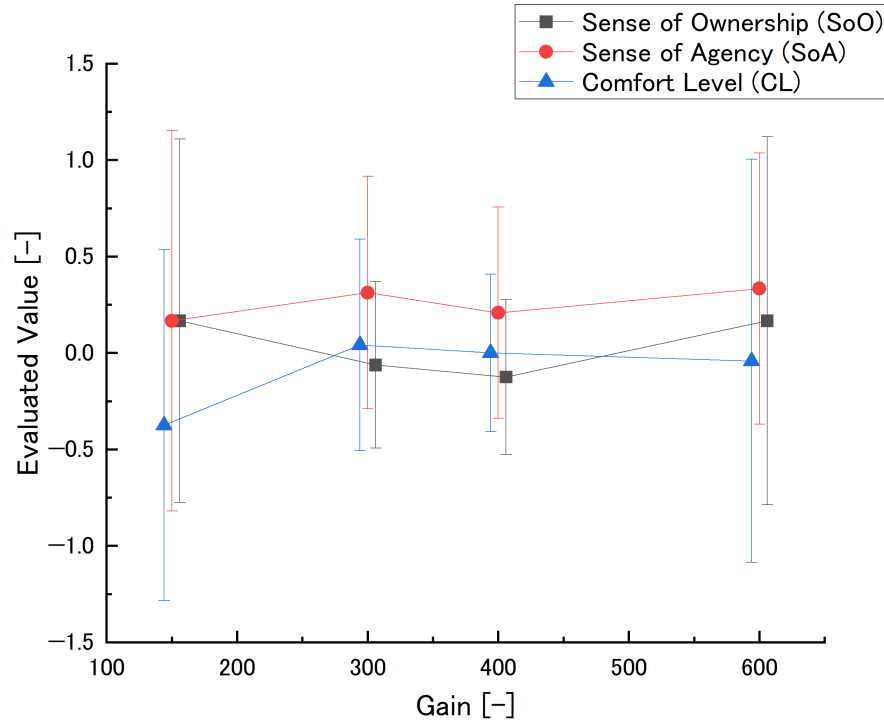

Figure 12: Gain in the preliminary experiment: evaluated value

### 43 Damping Coefficient

44 The evaluated values and effect sizes for the damping coefficient are shown in Figure 13 and Table 6.

- 45 • SoO values increased as the comparison setting value increased. The effect size of  $\zeta_3 - \zeta_4$  was “medium,” and
- 46 all other effect sizes were “large.”
- 47 • SoA values increased as the comparison setting value increased. All effect sizes, except for  $\zeta_3 - \zeta_4$  were “large.”

- 48 • CL values increased with increasing value in the range  $\zeta_1 \leq \zeta_i \leq \zeta_3$  and decreased with increasing value in  
 49 the range  $\zeta_3 \leq \zeta_i \leq \zeta_4$ . The effect size of  $\zeta_2 - \zeta_4$  was “medium” and that of  $\zeta_1 - \zeta_2$ ,  $\zeta_1 - \zeta_3$ ,  $\zeta_1 - \zeta_4$  and  $\zeta_2 - \zeta_3$   
 50 were “large.”

Table 6: Damping coefficient in the preliminary experiment: effect sizes (upper: SoO, middle: SoA, and lower: CL)

|           | $\zeta_2$ | $\zeta_3$ | $\zeta_4$ |
|-----------|-----------|-----------|-----------|
| $\zeta_1$ | .62**     | .77**     | .79**     |
| $\zeta_2$ |           | .80**     | .77**     |
| $\zeta_3$ |           |           | .46*      |

  

|           | $\zeta_2$ | $\zeta_3$ | $\zeta_4$ |
|-----------|-----------|-----------|-----------|
| $\zeta_1$ | .85**     | .87**     | .88**     |
| $\zeta_2$ |           | .64**     | .56**     |
| $\zeta_3$ |           |           | .12       |

  

|           | $\zeta_2$ | $\zeta_3$ | $\zeta_4$ |
|-----------|-----------|-----------|-----------|
| $\zeta_1$ | .86**     | .94**     | .93**     |
| $\zeta_2$ |           | .83**     | .54*      |
| $\zeta_3$ |           |           | .11       |

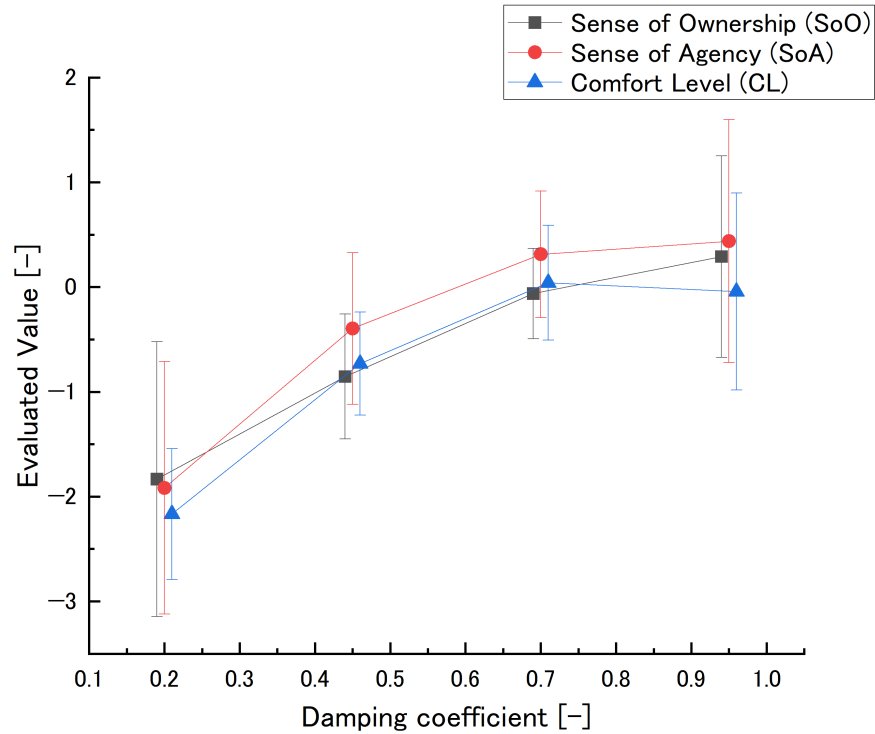

Figure 13: Damping coefficient in the preliminary experiment: evaluated value

## 51 DISCUSSION

### 52 Discrimination threshold

53 In gain, all effect sizes for  $K_3$ , which is the same as those in the standard setting, are “large,” suggesting the  
54 participants were able to discriminate each setting compared to the standard setting situation. This suggests that  
55 at least 100, the minimum change in this experiment, can be discriminated in gain.

56 In the natural angular frequency, all effect sizes for  $\omega_{np2}$ , which is the same as those in the standard setting,  
57 were either “medium” or “large,” suggesting the participants were able to discriminate between each comparison  
58 setting compared to the standard setting situation. This suggests the participants were able to discriminate at  
59 least 2, which is the natural angular frequency minimum change in this experiment. The fact that the effect size of  
60  $\omega_{np1} - \omega_{np2}$  was smaller than that of  $\omega_{np2} - \omega_{np3}$  and  $\omega_{np2} - \omega_{np4}$  suggests that it is easier to discriminate smaller  
61 changes than larger changes than one is able to in the standard setting situation.

62 In the damping coefficient, all effect sizes for  $\zeta_3$ , which is the same as those in the standard setting, are “large,”  
63 suggesting the participants were able to discriminate each setting compared to the standard setting situation. This  
64 suggests that at least 0.25, the minimum change in this experiment, can be discriminated for the damping coefficient.

65 In dead time, only the  $L_1 - L_2$  effect size for  $L_1$ , which is the same as that in the standard setting, shows a  
66 “medium” effect size, and none of the effect sizes show a “large” effect size.  $L_1 - L_3$  and  $L_1 - L_4$ , which are larger  
67 changes than  $L_1 - L_2$ , are smaller than  $L_1 - L_2$ . This result has two points. First, this experiment made only  
68 “positive delay” but participants answered “hyper responsive movement” at  $L_2$  with “medium” effect. Second,  
69 previous study indicated that above about 200 ms delay from the real body can be sufficiently detected by the  
70 participant [1]. However, in this study,  $L_4$  was not detected. Related to the first point, there is a phenomenon  
71 called “intentional binding,” in which the sensation of perception is shortened when the participant feels a SoA [2]. In  
72 Figure 7,  $L_2$  has maximum SoA and CL. It is considered that these caused “intentional binding” and participants  
73 answered “hyper responsive movement” at  $L_2$ . For the second point, there were some different points from the  
74 previous study, e.g., target body part (it was finger in previous study) and how to ask question (synchronicity  
75 between real finger and finger video image was asked in previous study). These variations could have possibly made  
76 a difference in the results.

### 77 Gain

78 In the SoO values, the effect sizes of  $K_1 - K_2$ ,  $K_2 - K_3$ , and  $K_3 - K_4$ , which compared adjacent settings, only the  
79 effect size of  $K_3 - K_4$  shows a “medium” value, while the other two are “small,” and  $K_2 - K_4$  shows a “small” in  
80 spite of  $K_2$  being the same as the standard setting. It indicates that  $K_3$  and  $K_4$  are varied around the standard  
81 setting. Therefore, it is considered that SoO has no trends in this range of gain.

82 SoA values did not change effectively regardless of the change in the comparison settings. However, when looking  
83 at the effect sizes of  $K_1 - K_2$ ,  $K_2 - K_3$ , and  $K_3 - K_4$ , which compare adjacent comparison settings, there were  
84 no effect sizes that indicated “medium” or “large,” while no other combination has “medium” or “large” effect.  
85 Therefore, there is no trend at SoA.

86 CL values increased from  $K_1$  to  $K_2$ , but did not change effectively in the range of  $K_2 \leq K_i \leq K_3$ . Looking at

87 the effect sizes for  $K_1 - K_2$ ,  $K_2 - K_3$ , and  $K_3 - K_4$ , each of which compares adjacent comparison settings, only  
88  $K_1 - K_2$  showed anything greater than “medium.” Therefore, the tendency for the value to increase from  $K_1$  to  
89  $K_2$  may be considered effective.

90 The range of gain in this study suggested that CL was impaired when gain was small, but gain had no effect  
91 on SoO or SoA. Gain is a parameter of movement intensity. Above a certain intensity, SoO, SoA, and CL are not  
92 affected, while only comfort is impaired at the lower intensity than a certain intensity. This suggests that CL may  
93 be a more acute questionnaire to the perceptions of changes in the target behavior than SoA.

## 94 **Damping Coefficient**

95 SoO increased as the comparison setting value increased. The effect size of  $\zeta_1 - \zeta_2$ ,  $\zeta_2 - \zeta_3$ , and  $\zeta_3 - \zeta_4$ , which  
96 compare adjacent comparison settings, respectively shows “large,” “large,” and “medium.”

97 SoA increased as the comparison setting value increased. The effect sizes of  $\zeta_1 - \zeta_2$ ,  $\zeta_2 - \zeta_3$ , and  $\zeta_3 - \zeta_4$ , which  
98 compare adjacent comparison settings, respectively show “large,” “large,” and “small.” Thus, this trend in the  
99 range of  $\zeta_1 \leq \zeta_i \leq \zeta_3$  may be effective. However, this trend in the range of  $\zeta_3 \leq \zeta_i \leq \zeta_4$  is hardly effective. In other  
100 words, SoA increased by increasing the damping coefficient in the low damping coefficient area, but has no effect  
101 on SoA in the high damping coefficient area.

102 CL increased with increasing value in the range of  $\zeta_1 \leq \zeta_i \leq \zeta_3$  and decreased with increasing value in the range  
103 of  $\zeta_3 \leq \zeta_i \leq \zeta_4$ . The effect sizes of  $\zeta_1 - \zeta_2$ ,  $\zeta_2 - \zeta_3$ , and  $\zeta_3 - \zeta_4$ , which compare adjacent comparison settings,  
104 respectively, show “large,” “large,” and “small.” Thus, this trend in the of range  $\zeta_1 \leq \zeta_i \leq \zeta_3$  may be effective.  
105 However, this trend in the range of  $\zeta_3 \leq \zeta_i \leq \zeta_4$  is hardly effective. In other words, CL increased by increasing the  
106 damping coefficient in the low damping coefficient area, but has no effect on CL in the high damping coefficient  
107 area. The results of SoO and CL indicate that these have the possibility that the trend of generating SoO in the  
108 damping coefficient differs from SoA and CL.

109 The damping coefficient is a parameter of overshoot. These results indicate that the low damping coefficient,  
110 which cause a larger overshoot, make SoO, SoA, and CL decrease, while the high damping coefficient, which causes  
111 a smaller overshoot, make SoO, SoA and CL increase. However, it indicates that overshoot affects only SoO in the  
112 low overshoot area. These results indicate that it has the possibility that the trend of generating SoO in overshoot  
113 differs from SoA and CL.

## 114 **SoA at Dummy Setting**

115 Similar to natural angular frequency and dead time, for gain and damping coefficient, SoA was higher than 0 in  
116 the dummy setting, which is the same case as in the standard setting. This suggests that SoA may be improved by  
117 repetition compared to the other perceptual characteristics, since the participants always experience the avatar in  
118 each setting after experiencing the standard setting due to the experimental protocol. In contrast, CL is introduced  
119 as the alternative parameter of limb heaviness in order to allow questions not only about the feeling of heaviness,  
120 but also about the feeling of lightness, based also on reports that comfort is related to SoA [3]. SoA is changed  
121 from this result and CL may be a more acute questionnaire method in some cases.

## 122 **References**

- 123 [1] M. Osumi, S. Nobusako, T. Zama, N. Yokotani, S. Shimada, T. Maeda, and S. Morioka. “The relationship and  
124 difference between delay detection ability and judgment of sense of agency.” In: *PLOS ONE*. 14.7 (2019).
- 125 [2] S. Kasahara, J. Nishida, and P. Lopes. “Preemptive action: accelerating human reaction using electrical muscle  
126 stimulation without compromising agency.” In: *Proceedings of the 2019 CHI Conference on Human Factors in*  
127 *Computing Systems*. 2019, pp. 1–15.
- 128 [3] M. Mishima, K. Hayashida, Y. Fukasaku, R. Ogata, K. Ohsawa, K. Iwai, W. Wen, and S. Morioka. “Adaptability  
129 of the sense of agency in healthy young adults in sensorimotor tasks for a short term.” In: *Behavioral Sciences*.  
130 13.2 (2023), p. 132.
